# Supplementary material
Source: Frontiers journal article supplement (https://www.frontiersin.org/articles/313359)
Supplement: Image_1.pdf [file Image_1.pdf]

# Bt Jute Expressing Fused $\delta$ -Endotoxin Cry1Ab/Ac for Resistance to *Lepidopteran* Pests

Majumder S, Sarkar C, Saha P, Gotyal BS, Satpathy S, Datta K, Datta SK (2017)

Front Plant Sci 8:2188. doi: 10.3389/fpls.2017.02188

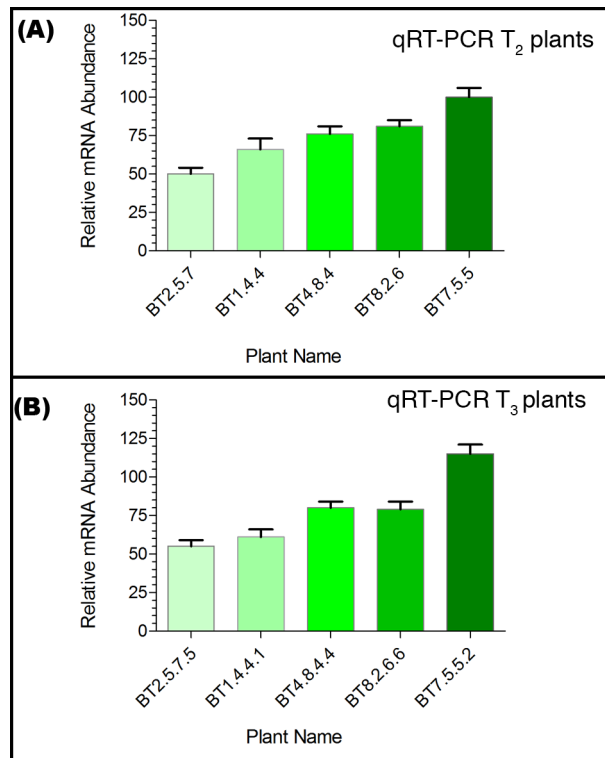

**Supplementary Figure S1 qRT-PCR analysis of mRNA transcript of T<sub>2</sub> and T<sub>3</sub> transgenic plants.** (A) qRT-PCR analysis of T<sub>2</sub> transgenic progeny plants (B) qRT-PCR analysis of T<sub>3</sub> transgenic progeny plants. Each bar represents the mean  $\pm$  standard error (SE) of 3 independent experiments and qualified  $P < 0.05$  in the Tukey's multiple comparisons test. Here *cry1Ab/Ac* gene expression was calculated on the basis of internal control *26S rRNA* gene expression.
